# Supplementary material
Source: publisher figshare collection journal article supplement (https://acs.figshare.com/ndownloader/files/4502239)
Supplement: Supplementary file 1 [file 4502239]

## Supporting Information

# Novel Metastable Hexagonal MoO<sub>3</sub> Nanobelts: Synthesis, Photochromic and Electrochromic Properties

*Lei Zheng, Yang Xu, Dong Jin, and Yi Xie\**

Department of Nanomaterials and Nanochemistry, Hefei National Laboratory for Physical Sciences at Microscale, University of Science and Technology of China,

Hefei, Anhui 230026, P. R. China

\* To whom correspondence should be addressed. Fax: 86-551-3606266. E-mail: [yxie@ustc.edu.cn](mailto:yxie@ustc.edu.cn)

### SI-1 TGA/DSC Curve of *h*-MoO<sub>3</sub> Nanobelts.

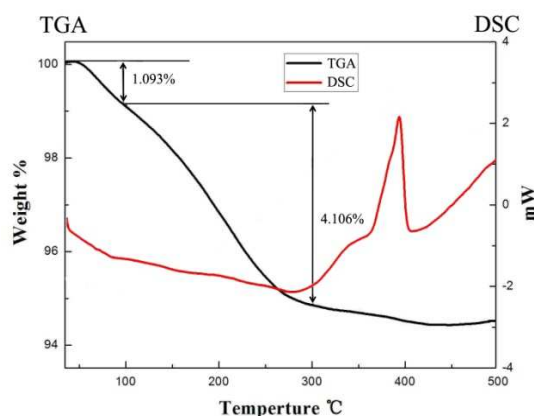

**Figure S1.** TGA/DSC curve of the *h*-MoO<sub>3</sub> nanobelts.

### SI-2 Morphology of *h*-MoO<sub>3</sub> in Presence of Different Concentration NaNO<sub>3</sub>.

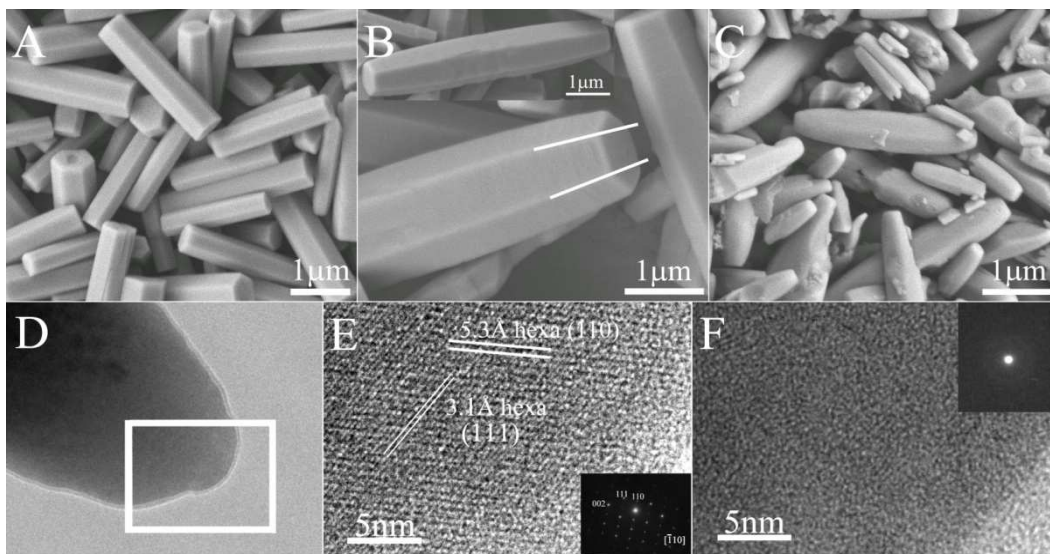

**Figure S2.** TEM images of the  $h$ -MoO<sub>3</sub> nanostructures fabricated at different amounts of NaNO<sub>3</sub>: the amounts of NaNO<sub>3</sub> are (A) 1.0 g, (B) 1.5 g, and (C) 3.0 g. (D) The TEM image of a  $h$ -MoO<sub>3</sub> capsule-shaped microprism, showing a change from a crystalline (E) to amorphous (F) state under electron irradiation by HRTEM images and SAED patterns.

When 1.0 g NaNO<sub>3</sub> was used, the obtained products were all regular hexagonal microprisms in basal-faceted shape, as shown in **Fig. S2A**. Increasing the added amount of NaNO<sub>3</sub> to 1.5 g, it could be observed that the products tend to form capsule-shaped hexagonal microprisms with slightly curving arrises (in **Fig. S2B**). Once more NaNO<sub>3</sub> is introduced into the reaction system, significant change takes place in morphology and size of crystals. **Fig. S2C** shows the SEM images of the sample fabricated at 3.0g NaNO<sub>3</sub>, which consists of capsule-shaped microprisms. The as-obtained sample is obviously small in size and nonuniform in shape. The corresponding HRTEM image and SAED of a unit plane (**Fig. S2D**) were shown in **Fig. S2E**. According to the HRTEM image, the prisms exhibit [-110] orientation, growing along the [001] direction. The clear lattice image and the sharp diffraction spots (inset) indicate the high crystallinity of the plane. Prolonging the electron

bombardment time to 5 min, all periodical lattices are also destroyed as the nanobelts, and the corresponding SAED pattern exhibits halo rings (as shown in **Fig. S2F**), indicating the instability of the hexagonal *h*-MoO<sub>3</sub> sample under strong electron beam.

### SI-3 Experiments and Structural Characterization of Orthorhombic $\alpha$ -MoO<sub>3</sub> Nanobelts.

The orthorhombic  $\alpha$ -MoO<sub>3</sub> nanobelts were easily obtained according to the reported route in Reference 13. In a typical procedure, molybdenum powders (2 mmol), deionized water (6 mL), and 30 wt% H<sub>2</sub>O<sub>2</sub> aqueous solution (4 mL) were successively added into a Teflon vessel (15 mL) under magnetic agitation until metal powders were dissolved completely. Subsequently, the vessel was transferred into a stainless steel autoclave and hydrothermally treated at 150 °C for 12 h. After natural cooling, the white aqueous suspensions of  $\alpha$ -MoO<sub>3</sub> nanobelts were obtained.

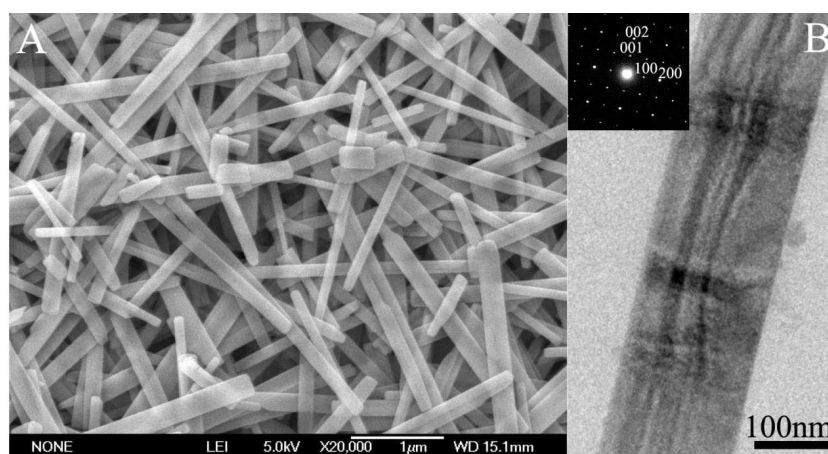

**Figure S3.** (A) TEM image of orthorhombic  $\alpha$ -MoO<sub>3</sub> nanobelts. (b) TEM image of an individual  $\alpha$ -MoO<sub>3</sub> nanobelt and its SAED pattern.

**SI-4 Band Structures of  $h$ -MoO<sub>3</sub> and  $\alpha$ -MoO<sub>3</sub> Calculated Based on Density Functional Theory Using the CASTEP Code Package.**

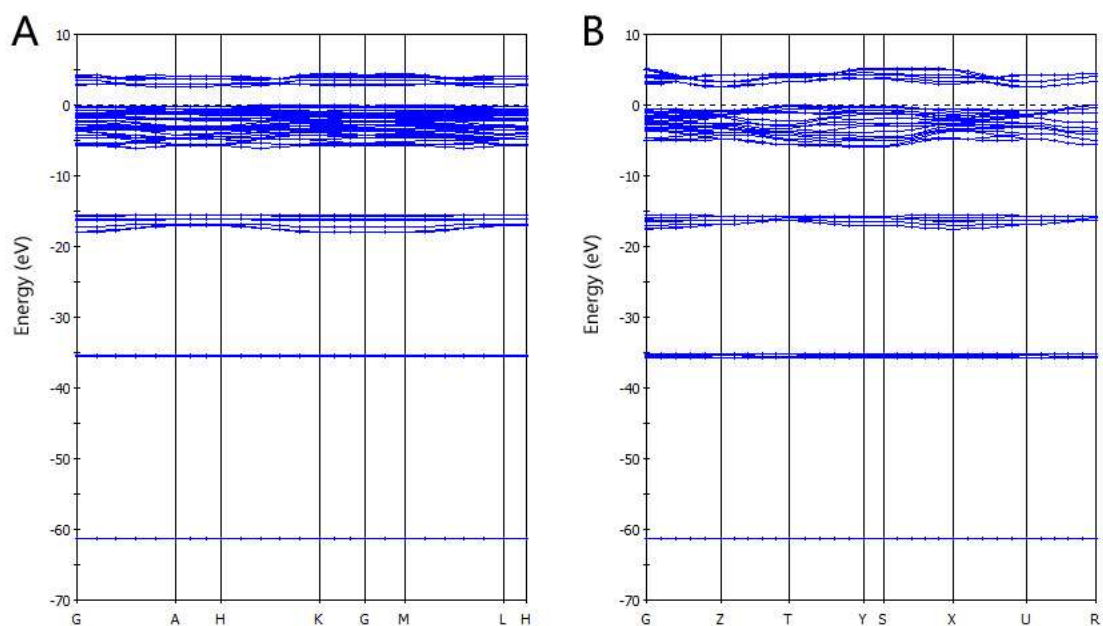

**Figure S4.** Calculated band structures of  $h$ -MoO<sub>3</sub> (A) and  $\alpha$ -MoO<sub>3</sub> (B); the corresponding calculated bandgaps are 2.65 eV and 2.59 eV, respectively.

## SI-5 Comparison of Photocatalytic Performance between $h$ -MoO<sub>3</sub> and $\alpha$ -MoO<sub>3</sub>.

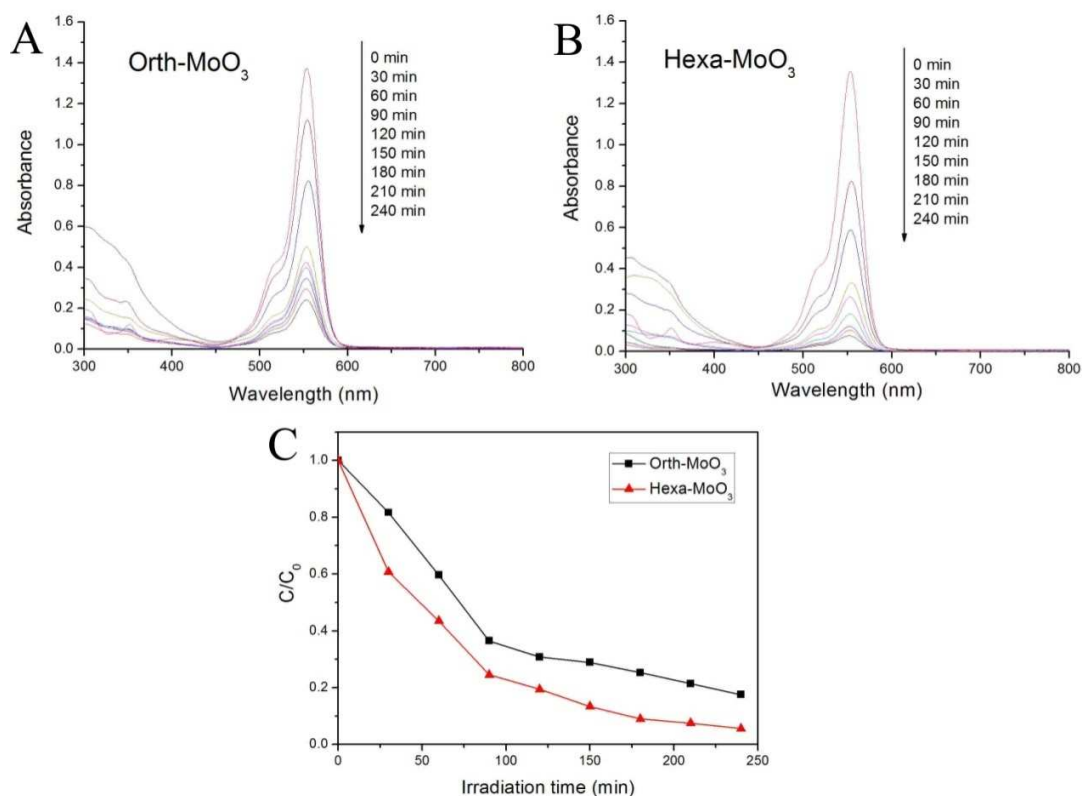

**Figure S5.** Comparative study on the photocatalytic performance for the degradation of Rhodamine B (RhB) with (A) orthorhombic  $\alpha$ -MoO<sub>3</sub> nanobelts and (B) hexagonal  $h$ -MoO<sub>3</sub> nanobelts, and (C) a comparison of photocatalytic activities.

## SI-6 Electrochromic performance of $h$ -MoO<sub>3</sub> microprism sample.

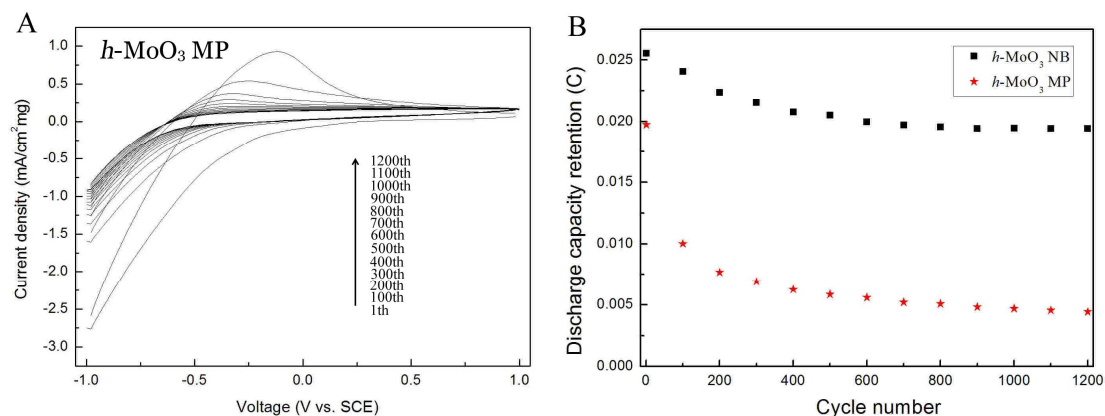

**Figure S6.** CV curves of the  $h$ -MoO<sub>3</sub> microprisms (MP) coated film for 1200th cycles, measured in 1.0 M LiClO<sub>4</sub>/PC solution with a sweep rate of 0.1 V/s and discharge capacity retention comparison between the  $h$ -MoO<sub>3</sub> microprism and nanobelt samples coated film after different CV cycles.
